# Supplementary material for: Intense light as anticoagulant therapy in humans
Source: PubMed Central journal article supplement (PMC7775081; doi:10.1371/journal.pone.0244792), 2020-12-31
Supplement: pone.0244792.s001.pdf [file pone.0244792.s001.pdf]

# S1 Fig

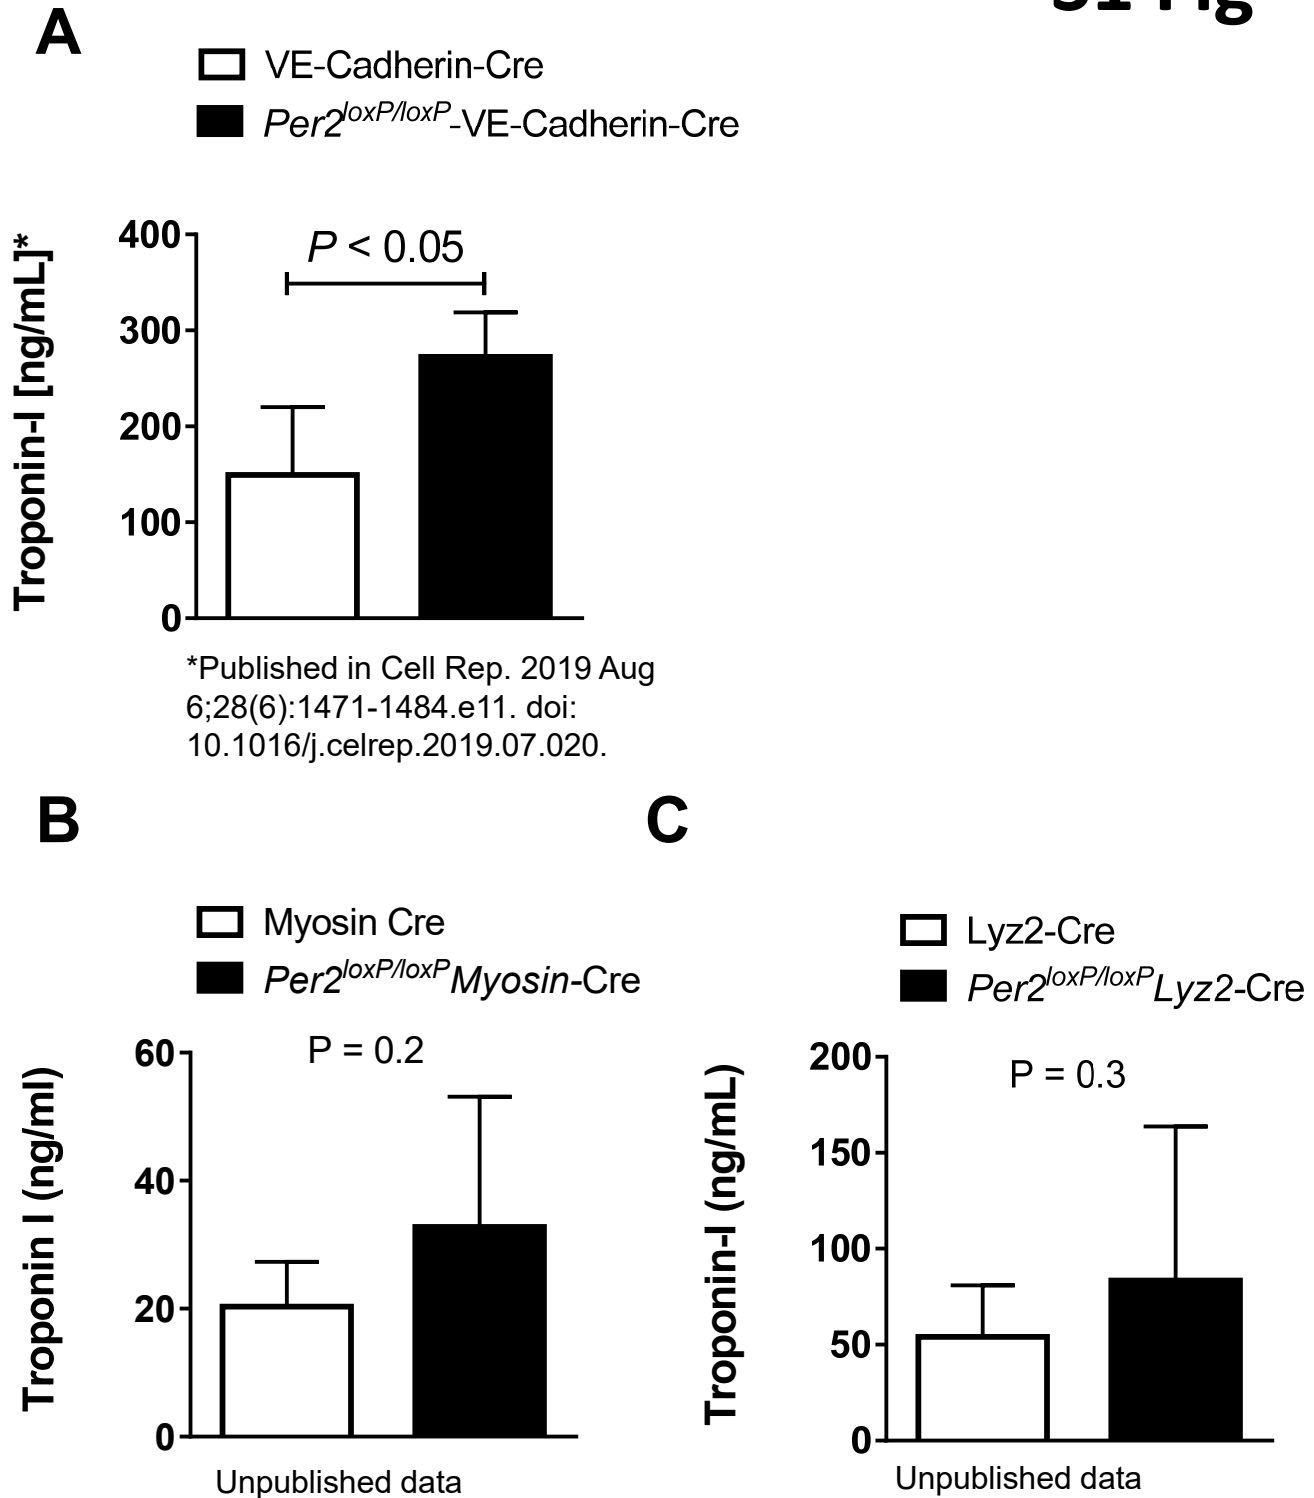

**S1 Fig.** Serum troponin-I from *Per2<sup>loxP/loxP</sup>*-VE Cadherin Cre (endothelial specific), *Per2<sup>loxP/loxP</sup>*-Myosin Cre (cardiomyocyte specific), *Per2<sup>loxP/loxP</sup>*-Lyz2 Cre (bone marrow specific) after 60 min of in situ myocardial ischemia and 2h reperfusion (mean±SD; n=5).
